# Supplementary material
Source: PubMed Central journal article supplement (PMC3463322)
Supplement: supp_M112.402727_jbc.M112.402727-1.pdf [file supp_M112.402727_jbc.M112.402727-1.pdf]

## SUPPLEMENTARY FIGURES AND TABLES

**Supplementary Figure 1: Identification of DERP6 and C3ORF75 by MS/MS.** On the top, the peptide sequences and ion scores of both identified proteins are mentioned. At the bottom, DERP6 and C3ORF75 protein sequences. Sequenced peptides are highlighted in red.

| Protein name                                  | SwissProt Access number | Mass Protein (Da) | Peptide Sequences                                                                                                                                                             | Start - End                                                                                  | Mass Observed (Da)                                                                           | Mr (expt) (Da)                                                                                    | Mr (calc) (Da)                                                                                    | Delta (Da)                                                                   | Ion Score                                   | Expect                                                                                                                                                      |
|-----------------------------------------------|-------------------------|-------------------|-------------------------------------------------------------------------------------------------------------------------------------------------------------------------------|----------------------------------------------------------------------------------------------|----------------------------------------------------------------------------------------------|---------------------------------------------------------------------------------------------------|---------------------------------------------------------------------------------------------------|------------------------------------------------------------------------------|---------------------------------------------|-------------------------------------------------------------------------------------------------------------------------------------------------------------|
| Dermal papilla-derived protein 6 <b>DERP6</b> | <b>Q8TE02</b>           | <b>35219</b>      | R.EGFSDINNRL<br>K.TEEAFPGGPLGALR.A                                                                                                                                            | 70 – 79<br>95 – 108                                                                          | 583.7800<br>707.9000                                                                         | 1165.5454<br>1413.7854                                                                            | 1165.5000<br>1413.7252                                                                            | 0.0455<br>0.0602                                                             | 56<br>52                                    | 6.3 <sup>e</sup> -04<br>1.5 <sup>e</sup> -03                                                                                                                |
| UPF0405 protein <b>C3ORF75</b>                | <b>Q0PNE2</b>           | <b>30116</b>      | K.GMSPAVL.- + Oxidation (M)<br>K.LTLLCDAK.T<br>K.LGVSLT <u>M</u> AR.E + Oxidation (M)<br>R.ATVCWELK.G<br>R.AEGLATGFCR.D<br>R.GQLVFLEGLK.S<br>R.DQSFTYQYK.I<br>K.SAVDVVFQAQK.E | 260 – 266<br>21 – 28<br>68 – 76<br>168 – 175<br>210 – 219<br>79 – 88<br>240 – 248<br>89 – 99 | 690.3800<br>467.3000<br>482.3200<br>502.7700<br>541.2500<br>552.5800<br>590.3500<br>596.5000 | 689.3727<br>932.5854<br>962.6254<br>1003.5254<br>1080.4854<br>1103.1454<br>1178.6854<br>1190.9854 | 689.3418<br>932.5001<br>962.5219<br>1005.4953<br>1080.5022<br>1102.6386<br>1178.5244<br>1190.6295 | 0.0309<br>0.0854<br>0.1036<br>1.9699<br>0.0168<br>0.5068<br>0.1610<br>0.3559 | 14<br>45<br>82<br>7<br>57<br>66<br>49<br>96 | 30<br>0.019<br>3.2 <sup>e</sup> -06<br>1.7 <sup>+</sup> +02<br>1.8 <sup>e</sup> -03<br>1.5 <sup>e</sup> -04<br>5.6 <sup>e</sup> -03<br>1.1 <sup>e</sup> -07 |

### DERP6

**1** MTPSEGARAG TGRELEMLDS LLALGGLVLL RDSVEWEGRS LLKALVKKSA  
**51** LCGEQVHILG CEVSEEEFR**E GFSDINNRL** VYHDFFRDPL NWSK**TEEAFP**  
**101** **GGPLGALR**AM CKRTDPVPVT IALDSLWLL LRLPCTTLCQ VLHAVSHQDS  
**151** CPGDSSSVGK VSVLGLLHEE LHGPGVPGAL SSLAQTEVTL GGTMGQASAH  
**201** ILCRRPRQRP TDQTQWFSIL PDFSLDLQEG PSVESQPYS DPHIPPVDPTT  
**251** HLTFNHLHLSK KEREARDSLI LPFQFSSEKQ QALLRPRPGQ ATSHIFYEPD  
**301** AYDDLQQEDP DDDLDI

### C3ORF75

**1** MFVELNLLN TTPDRAEQGK **LTLLCDAKTD** GSFLVHHFLS FYLKANCKVC  
**51** FVALIQSFHS YSIVGQK**LGV SLT**M**ARER****GQ** **LVFLEGLKSA** **VDVVFQAQKE**  
**101** PHPLQLREA NAGNLKPLFE FVREALKPV DSGEARWTYPV LLVDDLSVLL  
**151** SLGMGAVAVL DFIHYCR**ATV** **CWELK**GNMVV LVHDSGDAED EENDILLNGL  
**201** SHQSHLILR**A** **EGLATGFCRD** VHGQLRILWR RPSQPAVHRD **QSFTYQYKIQ**  
**251** DKSVSFFAK**G** M**SPAVL**

**Supplementary Figure 2: MS/MS spectra for one of the peptides sequenced from DERP6 (A) and C3ORF75 (B).**

(A)

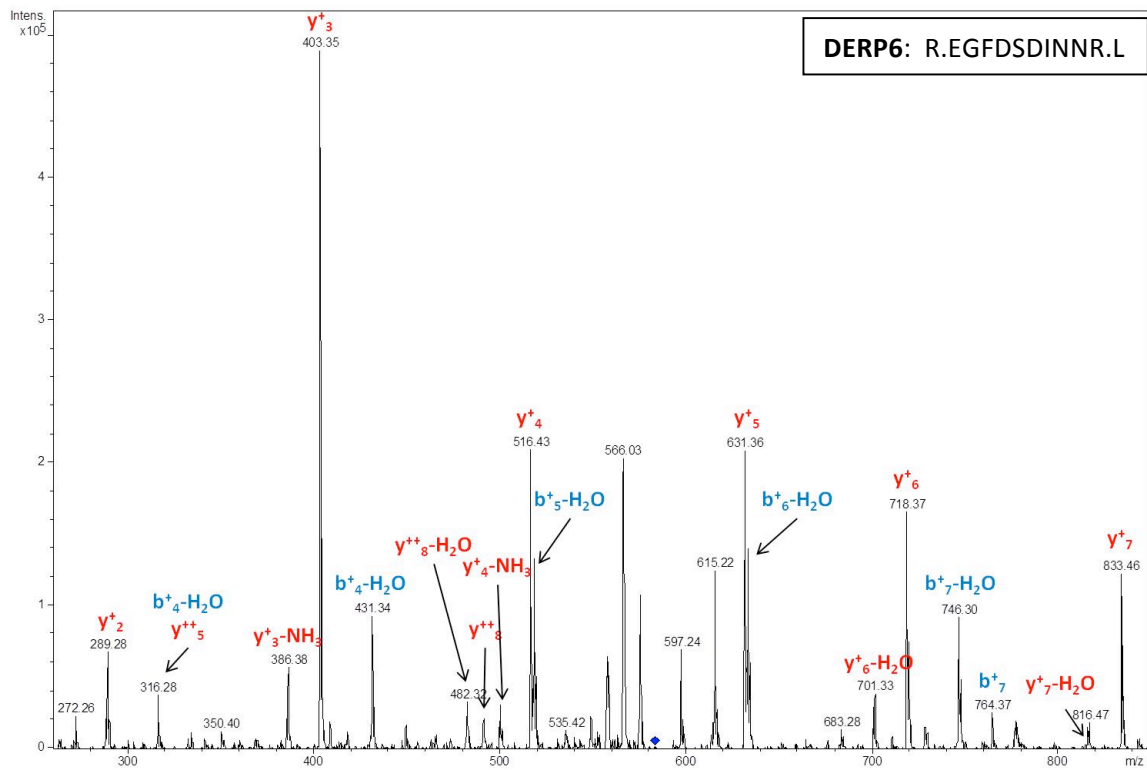

(B)

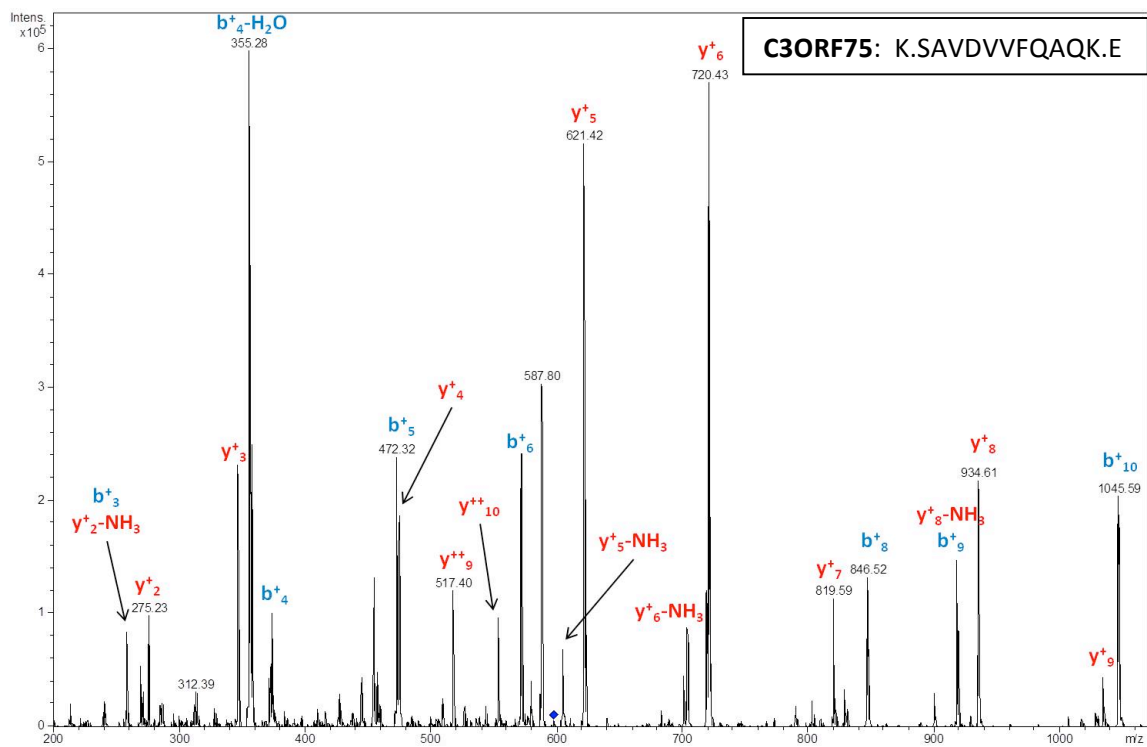

```

H.s. 1 : MTPSEGARAGTGRELEMDSLAIGGLVLRDSVEWEG..RSLKALVKKKALRGEQVHTGGCEVSEEEFREGFD.....SDINNRYVYHDFER
M.m. 1 : .....MLDSLAIGGLVLRDSVEWEG..RSLKALVKKKALRGEQVHTGGCEVSEEEFREGFD.....SDVNSRYVYHDLER
A.t. 1 : MAESIFRKLDRDGGEGELAPALTIETVASPFGLDVSGLYLLTNSSSILAGKSSSQGLVLTFFSRSPSYLQLLKQKGIIVSSSSKWRILDCYT
D.m. 1 : .....MISNLVYTKQKVIIDELNRRERAPKFIIGSLHEQOGGADTKAAPTGV.....KHAVATE
S.p. 1 : .....MSKELLNRCIRDLSPITVLRKDNLQTA..KPIINYYAKNAASRGIKVLEISYETLEKEAPEGID.CFLYATSWEKVKSLKELYE
S.c. 1 : ...MASSSHNPVILKRLRLSTESSPFIICLDSIAQTS..YKLIQEFVHQSKSKGNEYPIVYISFETVNVKPSYCT.....QFIDATQDFVHLVK

H.s. 88 : DPLNWS.KTEEAFPGGP.....LGAIRAMCKRTPVPVTTIALDSLWLLLRIPCTTLCQVLHAVSHQDSCPGDSSSVGKVS.VLGLLH...
M.m. 72 : DPLNWS.KPGEAVPEGP.....LKALRSCKRTHGVSVTIALDSLWLLCHTIPCVTLCQALHALSQQNGDPGDNSLVEQVR.VLGLLH...
A.t. 96 : DPLGIDQSSTSESESSLIKHLKCVSDLKKEFSSIEAGRELVGTGKTRFCVATDSVNEELLRHSAMPLVSGLLTDLRSHAQISSVFWSLN...
D.m. 60 : ALIDKYANNNTGSTTDS.....NSGFNVILPTLADLLCYQTPAFIFGFLNLRSDNVRRVFLWASPQHL
S.p. 82 : HISSRTQKQKQIIVMID.....TINPIINTSISSTMFPGSVLALGSIICFLTSPHKDVTLENYPSYLPCEVFLDFTSTCTVSLTGMQHLS
S.c. 86 : QIISVLPAAATQAQKH.....MVIDSDSNYISTEHTTRFLSEIASPHCFMVAIYHKDIKDNRTVI PDWNNN...YPDKITLQPMATTIVD

H.s. 169 : EELHGGPVGALSSLAQTEVTLGGTMGOASAHILCRRPRORPTDQOWFSTLPDFSLDLQEGPSVESQPYSDPHIPPVDPTT.....
M.m. 153 : EELHGGPVGALNTLAQTEVTLGSKVDQTSASILCRRPQQRATYQTWFFSVLPDFSLTLHEGLPLRSELHPDHHTTQVDPTA.....
A.t. 187 : TDLHQEKVTNALEYSTMKANLEPLCPSSDGQRNALENLFSVHQDFGKGRFHVRFKLRKGRVVRVMSEYHVDQSGINFSPISVDTVIAATKSLI
D.m. 126 : QDPHADIYLAGCEYLAELVLRLESDKLLSLIRKPGGGVSNRRYSCEVSKTQFKVTPLDGGPLPAGASPKQSPPEAEQTTEPAS.....
S.p. 168 : VEHDAKMRSLNPLPELQDDKLIISLLGNCETAIVLHVFEFRKSGR..ITKESCVLKNKLEPYTPFEETARGPEPADNQIDEN.....
S.c. 171 : IDVVLGTIDTEEVSELENEFRIPRGLNNDIPQLRLVNRKRSGRSLEYDFIVNSNTHEYELLSTTKQEESSSSNGLETPEMLQG.....

H.s. 251 : .HLTFNLHLSKREAREARDSLTLPPQFSSEKQALLRP.....RPGQATSHFYEPAFDDVLP..EDPDDLDI
M.m. 235 : .HLTFNLHLSKREAREARDSLTLPPQFSSEKQKALLHP.....VPSRTTGHFYEPAFDDVLP..EDPDDLDI
A.t. 282 : PKVQFNLCSEKREVEKVVLPFPHQDDGKSNEIYDGRSLVDGKIETTPLSMELQTDVVS SGGKSEIYFRISDDEHPDSDPDDLDI
D.m. 209 : .SIFKIEDEDEVLARNAITLPEYERTSEFSE.....GNITTYTPEADDFDE..EDPDDLDI
S.p. 251 : .VSEFNLVSEKREKRDVLEPYFSAQMVGSOHKSS.....FVDECTIYHAIEADDFDE..EDPDDLDI
S.c. 255 : .LTFNLGTSNRKRLAKDQVALPFLAQSEFGQ.....GCATVYVEYKDDYDE..EDPDDDFP.

```

**Supplementary Figure 3: Multiple sequence alignment of DERP6/ELP5 and its homologues from other species using ClustalW2 (1).** *H.s.*, *Homo sapiens*; *M.m.*, *Mus musculus*; *A.t.*, *Arabidopsis thaliana*; *D.m.*, *Drosophila melanogaster*; *S.p.*, *Schizosaccharomyces pombe*; *S.c.*, *Saccharomyces cerevisiae*. 60% conserved residues are shaded in light gray, 80% conserved residues are shaded in dark gray and identical residues are shaded in black. Similarity groups' option is enabled. Homology between human DERP6/ELP5 and *S. cerevisiae* Elp5 is 15% identical and 29% similar. Homology comparison of different homologues ranges from 8% identical/25% similar (*A. thaliana* and *S. cerevisiae*) to 71% identical/80% similar (*H. sapiens* and *M. musculus*).

**Reference:**

1. Larkin, M. A., Blackshields, G., Brown, N. P., Chenna, R., McGettigan, P. A., McWilliam, H., Valentin, F., Wallace, I. M., Wilm, A., Lopez, R., Thompson, J. D., Gibson, T. J., and Higgins, D. G. (2007) *Bioinformatics* **23**, 2947-2948

```

H.s. 1 : --MFVLENNLNTTPDRAEQ-----GKTLTCD-AKDGSEFLVHFFLS-FYTKANCK--VCFVALIQSFSHYSIVGQKLCVSLTMAERERGQLVE
M.m. 1 : --MFPELNNLSTTPDKTEQ-----GTTLTCD-AKDGSEFLVHFFLS-FYTKANCK--VCFVALIQSFSHYNIVGQKLCVSLTAARDRGQLVE
A.t. 1 : --MDRSLNLLDLALGFDEQLAIPSPLNKGVILLEDCEVEISGSEFLVHQLMK-RVLSNSSDALIFLAFARPFSHYDRILRNLGCNLIATHKSNRLVE
D.m. 1 : ----MATSVLLACGLNEQKLP-----GEVHHSSESNVDGSEFLTSCVVG-QRDRISNAG-TLLVCLQHHYQHYFNAGMRLCYNTNIFQG-KTLGV
S.p. 1 : -----MSSHEHLRPIEPE-----FSITLLGTRELPVTFHFHYLY-HALKAKES--TCEITFSKTLDEHAISMRWEMDITKTKN--FFE
S.c. 1 : MSSVQRQDLVIFSDQSVLPAHFFQDSNSHNFFITHQSCIQPLMFINALVETHVLTGSPSSLNESSSSMLPSSSTRSHAVLASFIHEQNYFTNSLNKLIK

H.s. 84 : EGLKSAVDVVFQAQKEPHPLQFLREANAGNLKPLFEFVREALKPVDSGEARWTPVLLVDD-----LSVLLSLTGMG--AVAVDFTHYCRATVCWE
M.m. 84 : EGLKSSVEVLFHSQDEPHPLQFLREAGTGNLQSLTYFTIQDTLKPADSEESPWKYPVLLVDD-----LSVLLSLTGVG--AVAVDFMQYCRATVCCE
A.t. 94 : FD-----MLMVKCSDGDQ-----MEDNVSAAVAKLFREIQETVRKLOSVTS--GNITVMVDD-----MSLLEIATTGNSNDHVLDFLHYC-HTSSE
D.m. 83 : ID-----VLSDMAGEGLASKWLTNTEGQTLTEQLVEDIRAQVESNYANRNSYTVLTDN-----LSITLFGAS-----KIQVQQFCQDLAALG
S.p. 78 : IDG----FSMLFAPISKPS----KVOAPEKKNHFKSVFAPVTCQVEENDEEFENSITITED-----IDLIQ-----STHAFDSTKIQQAITELR
S.c. 98 : IP-----SNNYNVLDLSDFIVNIHNKPRDKLISDVLAKFSAAIQNNPTDITVITIQPELILSLVSGITCSELNNKFTPLLRQCKVITIV

H.s. 174 : LKGNMVLVHDSGDAEEDNDILLNGSHQSHITRAEGLATGFCRDVHGQLRLLWRRPSQP----AVHRDQSFTYQYKIQDKSVSPEAKGMSPAVL
M.m. 174 : LKGNVVALVHDTGATDEGNDTLLNGSHQSHILRAEGLATGFCRDVHGQLSLWRRPSPS----TAQRAQSLTYQYKIQDNKVSPEAKGMSPAVL
A.t. 172 : SNCSLVITNHEDIYASMERPAFLIQVCLADVVIKAEPLASGLANVHGQLTVLNKGISNSG--RGSSRNKLNQFCRIRKENGIDYEPCCRS---
D.m. 161 : KEREKLVITKLSNS--DIYQLTDNNVAKLGQVRIQVLRIRKSGVFRVVDGRLTHERVLDEGN---YACEETRKEVLYKQVNDRNKVKVAPGEIGVKV
S.p. 154 : -KCFSRVIVNVTLGAPLPQKSLGSSIGHMATRCHSCRPLRSGSARRITCELRHRSRMNHFRSGICETPEDDDKELLYEITTEAGAKVYSKQVTLQL
S.c. 185 : SNSDIFNIDEYDASVHPSNLQNFYKSSFIKSMNINLNLPLRTGFAKDVITGSLHVCRGGAPIATS-NTSLHVVENEVYLNKEKSTKLYR-----

```

**Supplementary Figure 4: Multiple sequence alignment of C3ORF75/ELP6 and its homologues from other species using ClustalW2 (1).** *H.s.*, *Homo sapiens*; *M.m.*, *Mus musculus*; *A.t.*, *Arabidopsis thaliana*; *D.m.*, *Drosophila melanogaster*; *S.p.*, *Schizosaccharomyces pombe*; *S.c.*, *Saccharomyces cerevisiae*. 60% conserved residues are shaded in light gray, 80% conserved residues are shaded in dark gray and identical residues are shaded in black. Similarity groups' option is enabled. Homology between human C3ORF75/ELP6 and *S. cerevisiae* Elp6 is 9% identical and 25% similar. Homology comparison of different homologues ranges from 8% identical/26% similar (*M. musculus* and *S. cerevisiae*) to 80% identical/90% similar (*H. sapiens* and *M. musculus*).

**Reference:**

1. Larkin, M. A., Blackshields, G., Brown, N. P., Chenna, R., McGettigan, P. A., McWilliam, H., Valentin, F., Wallace, I. M., Wilm, A., Lopez, R., Thompson, J. D., Gibson, T. J., and Higgins, D. G. (2007) *Bioinformatics* **23**, 2947-2948

**Supplementary Table 1: shRNA sequences used in this study**

| <b>shRNA species</b>          | <b>and</b> | <b>Tracking number</b> | <b>Sequence</b>        |
|-------------------------------|------------|------------------------|------------------------|
| <b>Ctrl</b>                   |            | SHC002                 | non-mammalian sequence |
| <b>Elp1#1</b><br>mus musculus |            | TRCN0000088775         | CGCTGAGTGAAGTGGTACAAA  |
| <b>Elp1#2</b><br>mus musculus |            | TRCN0000088773         | CCTCAGTTCCTGTTGTTTCATA |
| <b>Elp3#1</b><br>mus musculus |            | TRCN0000039309         | CGGAGAGATTATGTTGCCAAT  |
| <b>Elp3#2</b><br>mus musculus |            | TRCN0000039311         | GCACAAGAAATTATTACCGAA  |
| <b>Elp5#1</b><br>mus musculus |            | TRCN0000192282         | CCTTGTCCTTTGTTACTTTGT  |
| <b>Elp5#2</b><br>mus musculus |            | TRCN0000189577         | CCCTGTGTTACACTCTGTCAA  |
| <b>ELP5</b><br>homo sapiens   |            | TRCN0000130483         | GCCCAGAACCATCTTTCTATT  |
| <b>Elp6#1</b><br>mus musculus |            | TRCN0000267114         | CTTCTACCTGAAAGCTAATTG  |
| <b>Elp6#2</b><br>mus musculus |            | TRCN0000267116         | TGTCCAGTCCTTCAGCCATTA  |

**Supplementary Table 2: Oligonucleotide sequences used to assess mRNA expression through qRT-PCR analysis**

| <b>Name species</b>    | <b>and</b> | <b>Forward primer</b>         | <b>Reverse primer</b>   |
|------------------------|------------|-------------------------------|-------------------------|
| GAPDH<br>mus musculus  |            | TGATGACATCAAGAAGGT<br>GGTGAAG | TCCTTGGAGGCCATGTAGGCCAT |
| ELP3<br>mus musculus   |            | AGGACCTGACTCCGATTTTG          | CTCTCATGGAAGTTGGCTCA    |
| ELP5#1<br>mus musculus |            | CATTGCCCTTGACTCTCTCA          | CAGAGCATGTAGGGCTTGAC    |
| ELP5#2<br>mus musculus |            | GTCTCCTGAAGGCTCTTATC          | TCTGAAGAGGTCATGGTAAAC   |
| ELP6#1<br>mus musculus |            | CCGGA ACTCAACAACCTTCT         | AGCGTCACAGAGGAGAGTCA    |
| ELP6#2<br>mus musculus |            | GTCTGCTTTGTGGCACTTGT          | AGAGGACTTGAGACCCTCCA    |
